# Supplementary material for: Laser-synthesized plasmonic HfN-based nanoparticles as a novel multifunctional agent for photothermal therapy
Source: Royal Society of Chemistry journal article supplement (doi:10.1039/d4nr02311k), 2024-01-01
Supplement: d4nr02311k1.pdf [file d4nr02311k1.pdf]

## SUPPLEMENTARY INFORMATION

Received 3rd June 2024,  
Accepted 27th August 2024

DOI: 10.1039/d4nr02311k

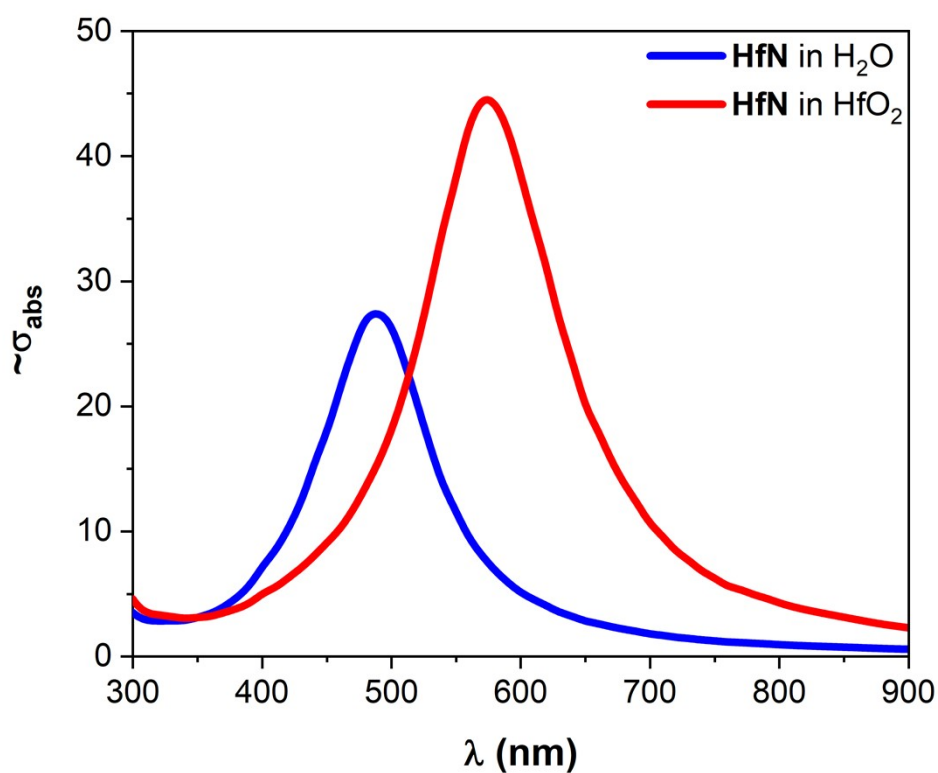

Fig. S1 Calculated Joule number values, proportional to absorption cross-section  $\sigma_{\text{abs}}$  for HfN NPs in water (blue line) and hafnium oxide (red line) surrounding medium.

<sup>a</sup> Aix-Marseille University, CNRS, LP3, 13288, Marseille, France.

<sup>b</sup> MEPhI, Institute of Engineering Physics for Biomedicine (PhysBio), 115409, Moscow, Russia.

<sup>c</sup> Shemyakin-Ovchinnikov Institute of Bioorganic Chemistry of Russian Academy of Sciences, 117997, Moscow, Russia.

<sup>d</sup> Uppsala University, Department of Medicinal Chemistry, 75310, Uppsala, Sweden.

<sup>e</sup> Institute of Nano Science and Technology, Mohali, 140306, India

<sup>f</sup> P. N. Lebedev Physical Institute of the Russian Academy of Sciences, 119991, Moscow, Russia

<sup>g</sup> National Research Center "Kurchatov Institute", 123182, Moscow, Russia

**Laser-  
synthesized  
plasmonic HfN-**

**based nanoparticles as a novel multifunctional agent for  
photothermal therapy**

A. I. Pastukhov,<sup>a</sup> M. S. Savinov,<sup>b</sup> I. V. Zelepukin,<sup>c,d</sup> J. S. Babkova,<sup>c</sup> G. V. Tikhonowski,<sup>b</sup> A. A. Popov,<sup>b</sup>  
S. M. Klimentov,<sup>b</sup> A. Devi,<sup>e</sup> A. Patra,<sup>e</sup> I. N. Zvestovskaya,<sup>b,f,g</sup> S. M. Deyev,<sup>b,c,g</sup> A.V. Kabashin\*<sup>a,b</sup>

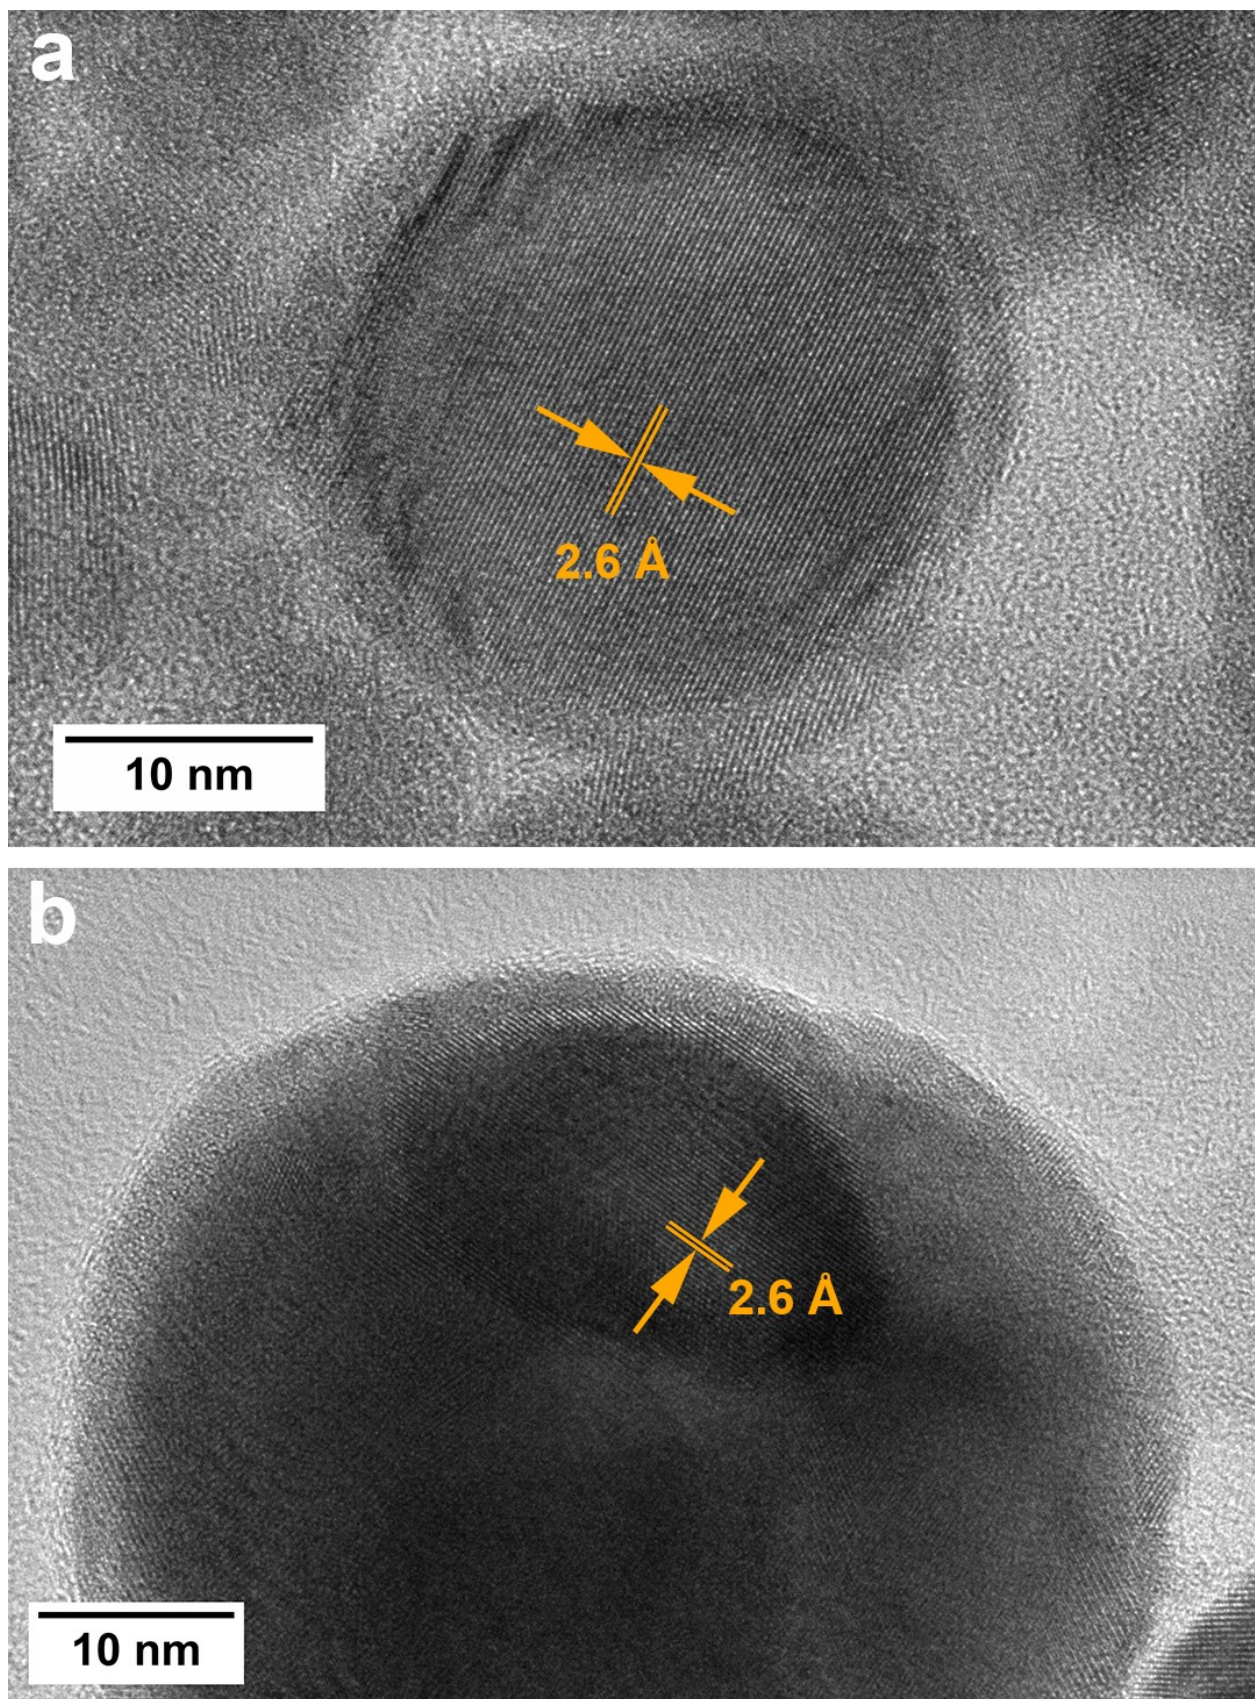

Fig. S2 HR-TEM images of HfN-based NPs prepared in (a) ethanol and (b) acetone. The interplanar spacing of the laser-synthesized NPs is about 0.26 nm, which corresponds to the table value for (111) plane of crystalline HfN.

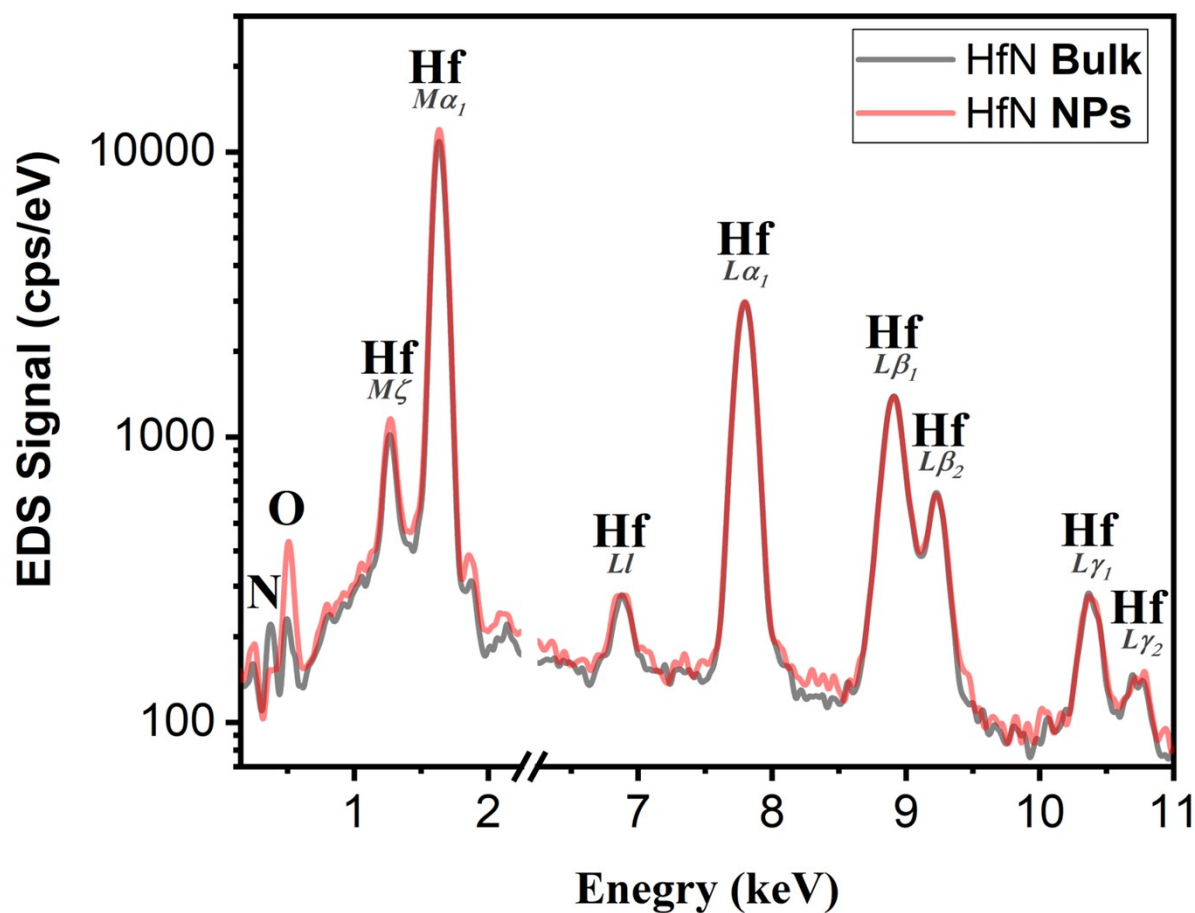

Fig. S3 EDS spectrum of HfN-based NPs prepared in acetonitrile.

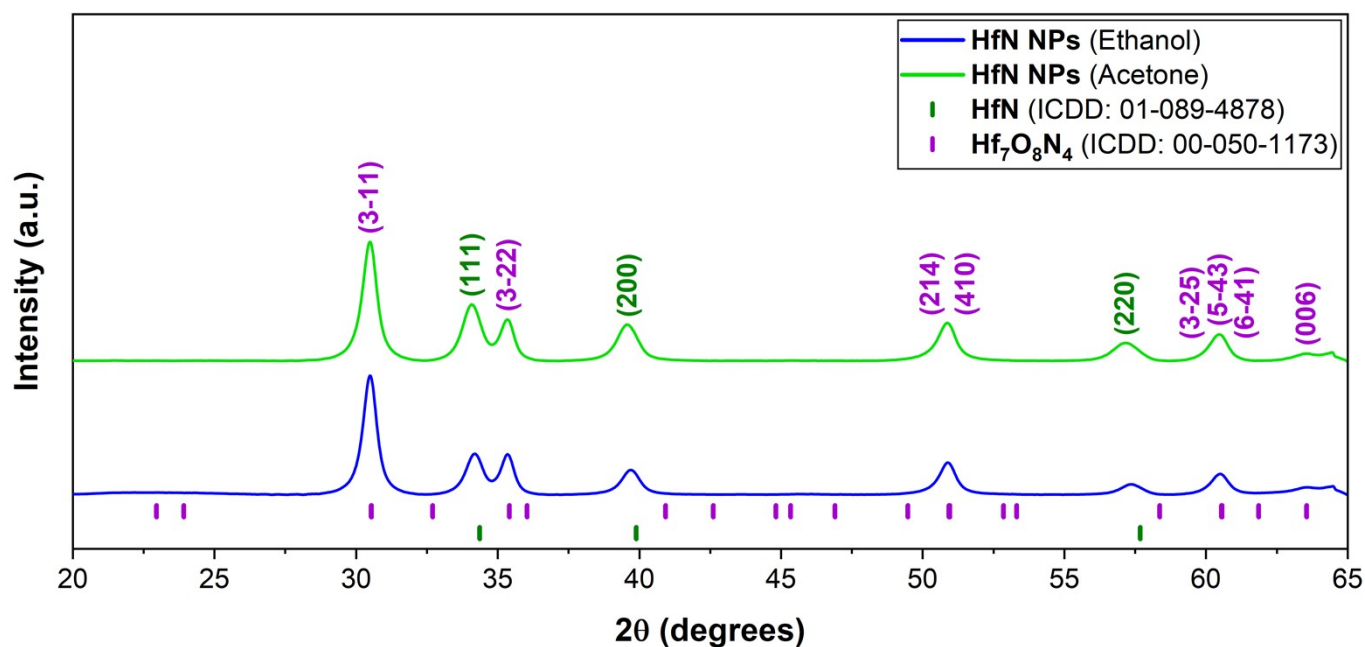

Fig. S4 XRD patterns of HfN-based NPs powders prepared in ethanol (blue line) and acetone (green line). Table positions of crystalline HfN and Hf<sub>7</sub>O<sub>8</sub>N<sub>4</sub> are given above the pattern.

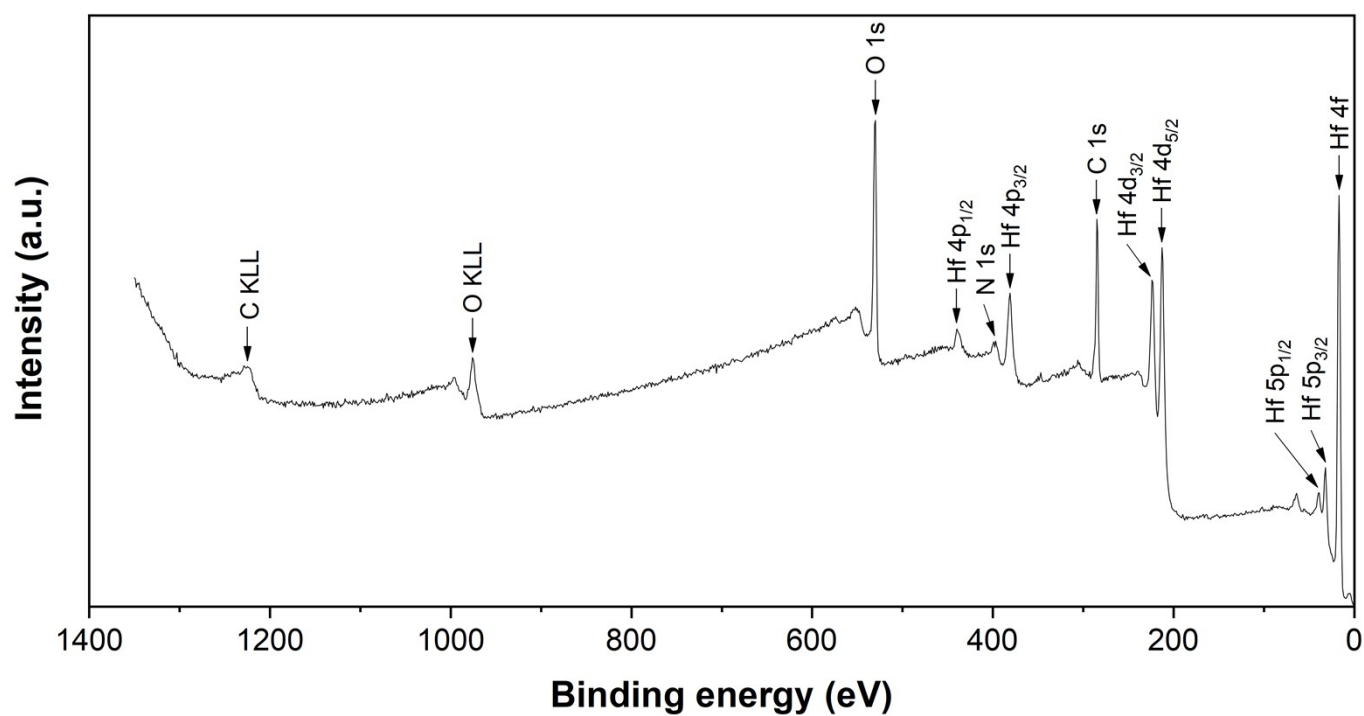

Fig. S5 XPS survey spectrum of HfN NPs prepared in acetonitrile.

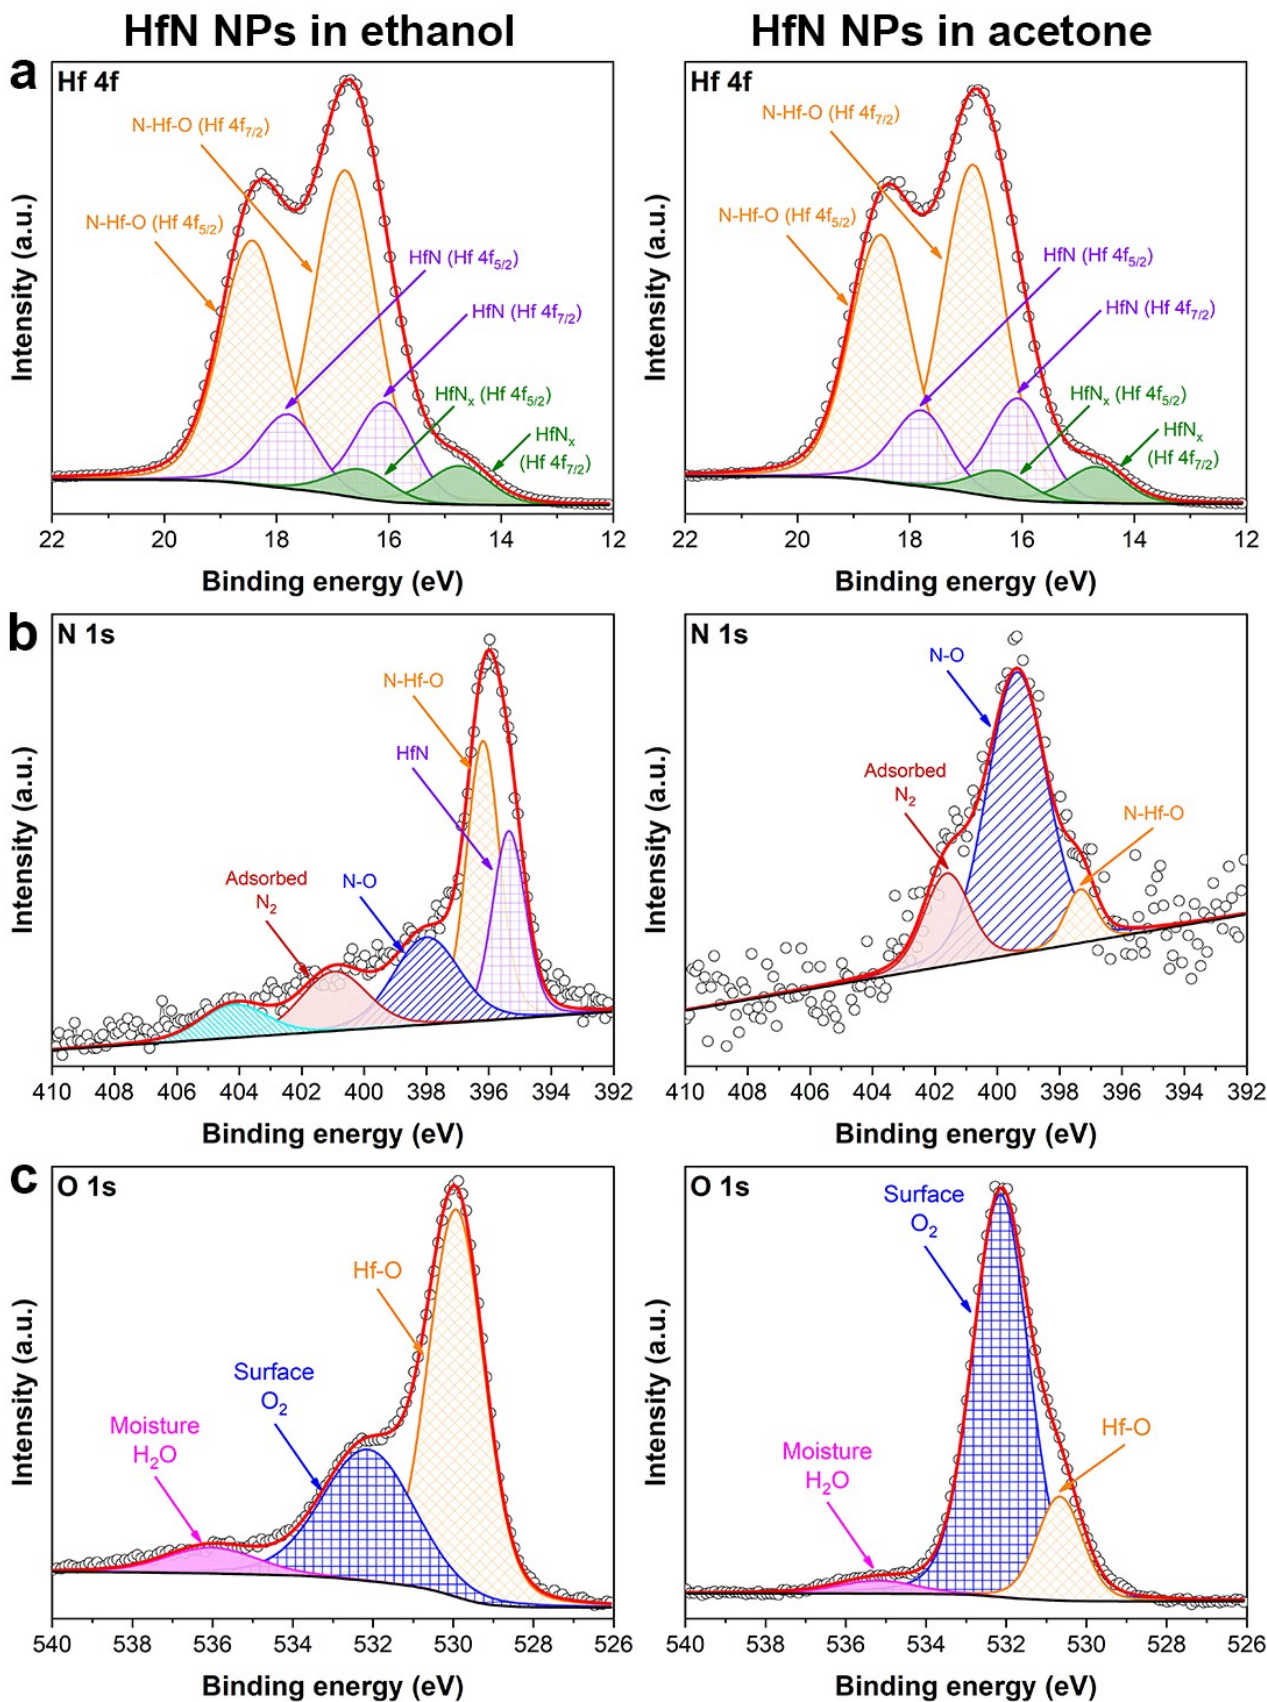

Fig. S6 X-ray Photoelectron Spectroscopy (XPS) characterization of laser-synthesized HfN-based NPs in ethanol (left) and acetone (right): Hf 4f (a), N 1s (b), O 1s (c). Shirley background correction is applied.

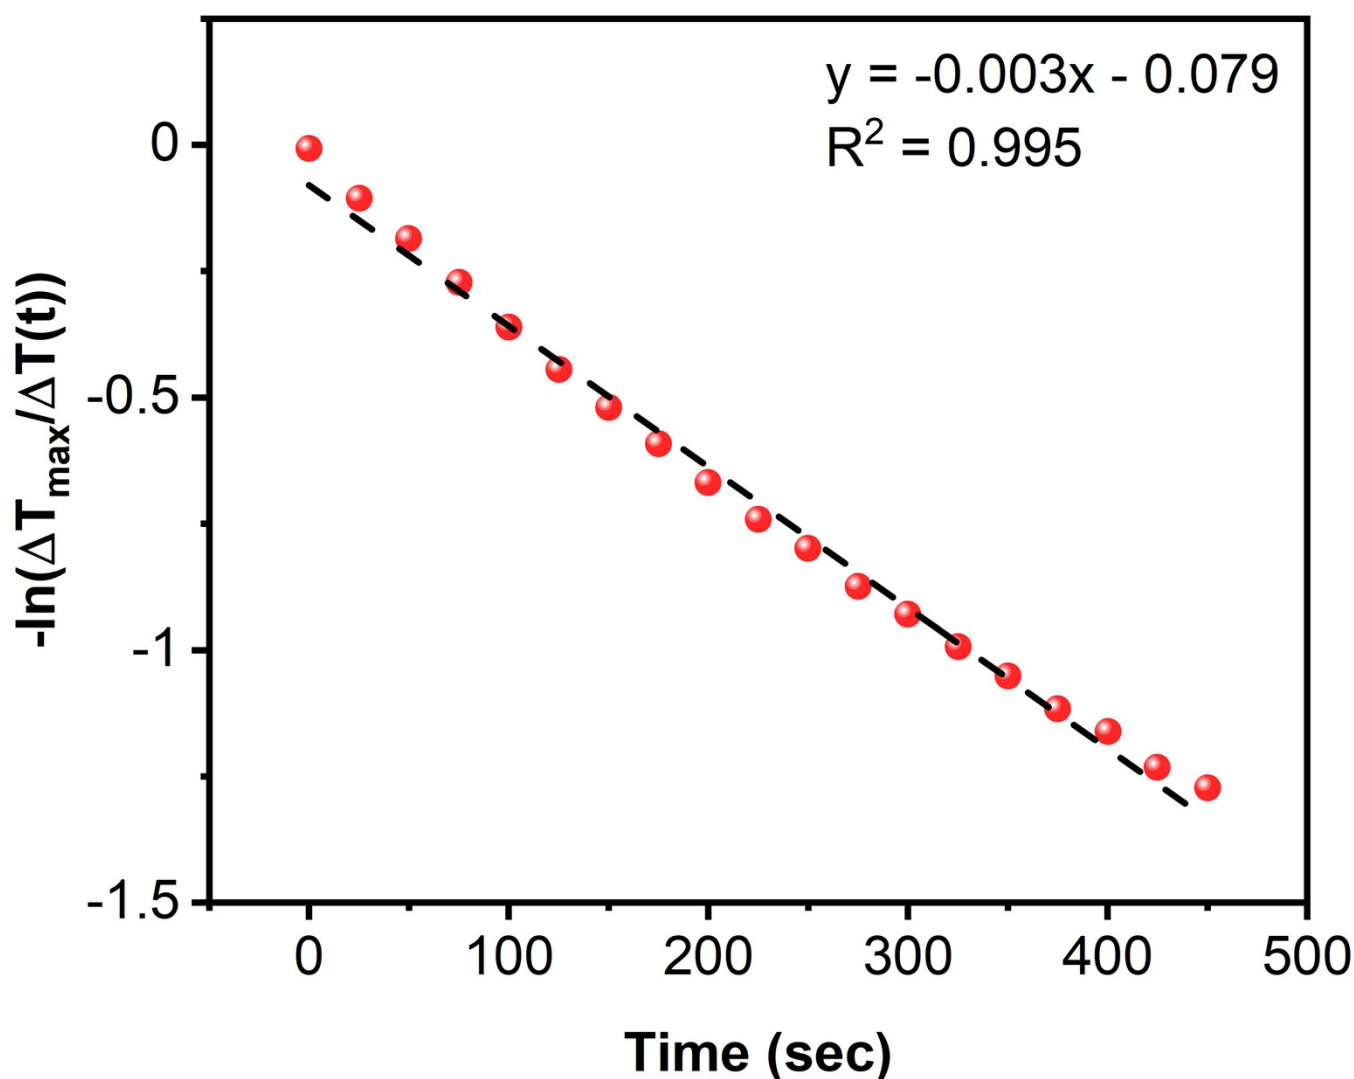

Fig. S7 Dependence of negative natural logarithm of temperature ratio on cooling time.

The Joule (Jo) number describes heat generation properties of nanoparticles composed of different materials and placed in various media.<sup>1</sup> The definition of Jo number reads as follows:

$$Jo = 9 \frac{e\varepsilon''}{n_s} \left| \frac{\varepsilon_s}{\varepsilon + \varepsilon_s} \right|^2 = \frac{\lambda_{ref} \sigma_{abs}}{2\pi V},$$

where  $e = \lambda_{ref}/\lambda$  with  $\lambda_{ref} \approx 1240 \text{ nm}$ ,  $\lambda$  is the wavelength,  $\varepsilon''$  is the imaginary part of the permittivity of nanoparticle material,  $n_s$  is the real part of the refractive index of the surrounding medium ( $\varepsilon_s = n_s^2$ );  $\sigma_{abs}$  is the absorption cross-section and  $V$  is the volume of the nanoparticle. Optical constants for calculations (Fig. S1) were taken from the following sources.<sup>2-4</sup>

## References

1. A. Lalis, G. Tessier, J. Plain and G. Baffou, *The Journal of Physical Chemistry C*, 2015, **119**, 25518-25528.
2. G. M. Hale and M. R. Querry, *Appl. Opt.*, 1973, **12**, 555-563.
3. M. F. Al-Kuhaili, *Optical Materials*, 2004, **27**, 383-387.

4. C. G. Ribbing and A. Roos, in *Handbook of Optical Constants of Solids*, ed. E. D. Palik, Academic Press, Burlington, 1997, pp. 351-369.
